# Supplementary material for: Complete Mitochondrial Genome of Four Peristediidae Fish Species: Genome Characterization and Phylogenetic Analysis
Source: MDPI journal article supplement (doi:10.3390/genes15050557), 2024-04-27
Supplement: s1 [file s1]

Table S1. Summary of gene/element feature of *P. liorhynchus*.

| Gene     | Position-start | Position-end | Length<br>(bp) | Amino<br>acid | Start<br>codon | Stop<br>codon | Intergenic<br>region (bp) | Strand |
|----------|----------------|--------------|----------------|---------------|----------------|---------------|---------------------------|--------|
| tRNA-Phe | 1              | 68           | 68             |               |                |               | 0                         | H      |
| 12S rRNA | 69             | 1014         | 946            |               |                |               | 0                         | H      |
| tRNA-Val | 1015           | 1086         | 72             |               |                |               | 0                         | H      |
| 16S rRNA | 1087           | 2781         | 1695           |               |                |               | 0                         | H      |
| tRNA-Leu | 2782           | 2855         | 74             |               |                |               | 0                         | H      |
| ND1      | 2856           | 3830         | 975            | 324           | ATG            | TAG           | 0                         | H      |
| tRNA-Ile | 3835           | 3904         | 70             |               |                |               | 4                         | H      |
| tRNA-Gln | 3904           | 3974         | 71             |               |                |               | -1                        | L      |
| tRNA-Met | 3974           | 4042         | 69             |               |                |               | -1                        | H      |
| ND2      | 4043           | 5088         | 1046           | 348           | ATG            | TA            | 0                         | H      |
| tRNA-Trp | 5089           | 5159         | 71             |               |                |               | 0                         | H      |
| tRNA-Ala | 5161           | 5229         | 69             |               |                |               | 1                         | L      |
| tRNA-Asn | 5231           | 5303         | 73             |               |                |               | 1                         | L      |
| tRNA-Cys | 5341           | 5406         | 66             |               |                |               | 37                        | L      |
| tRNA-Tyr | 5407           | 5476         | 70             |               |                |               | 0                         | L      |
| COI      | 5478           | 7028         | 1551           | 516           | GTG            | TAA           | 1                         | H      |
| tRNA-Ser | 7029           | 7099         | 71             |               |                |               | 0                         | L      |
| tRNA-Asp | 7103           | 7175         | 73             |               |                |               | 3                         | H      |
| COII     | 7183           | 7873         | 691            | 230           | ATG            | T             | 7                         | H      |
| tRNA-Lys | 7874           | 7947         | 74             |               |                |               | 0                         | H      |
| ATPase 8 | 7949           | 8116         | 168            | 55            | ATG            | TAA           | 1                         | H      |
| ATPase 6 | 8107           | 8789         | 683            | 227           | ATG            | TA            | -10                       | H      |
| COIII    | 8790           | 9574         | 785            | 261           | ATG            | TA            | 0                         | H      |
| tRNA-Gly | 9575           | 9646         | 72             |               |                |               | 0                         | H      |
| ND3      | 9647           | 9995         | 349            | 116           | ATG            | T             | 0                         | H      |
| tRNA-Arg | 9996           | 10064        | 69             |               |                |               | 0                         | H      |
| ND4L     | 10065          | 10361        | 297            | 98            | ATG            | TAA           | 0                         | H      |
| ND4      | 10355          | 11736        | 1382           | 460           | ATG            | TA            | -7                        | H      |
| tRNA-His | 11737          | 11805        | 69             |               |                |               | 0                         | H      |
| tRNA-Ser | 11806          | 11873        | 68             |               |                |               | 0                         | H      |
| tRNA-Leu | 11879          | 11951        | 73             |               |                |               | 5                         | H      |
| ND5      | 11952          | 13790        | 1839           | 611           | ATG            | TAA           | 0                         | H      |
| ND6      | 13787          | 14308        | 522            | 173           | ATG            | TAG           | -4                        | L      |
| tRNA-Glu | 14309          | 14377        | 69             |               |                |               | 0                         | L      |
| Cyt b    | 14383          | 15523        | 1141           | 380           | ATG            | T             | 5                         | H      |
| tRNA-Thr | 15524          | 15595        | 72             |               |                |               | 0                         | H      |
| tRNA-Pro | 15595          | 15664        | 70             |               |                |               | -1                        | L      |
| D-loop   | 15665          | 16533        | 869            |               |                |               | 0                         | H      |

Table S2. Summary of gene/element feature of *S. welchi*.

| Gene     | Position-start | Position-end | Length<br>(bp) | Amino<br>acid | Start<br>codon | Stop<br>codon | Intergenic<br>region (bp) | Strand |
|----------|----------------|--------------|----------------|---------------|----------------|---------------|---------------------------|--------|
| tRNA-Phe | 1              | 68           | 68             |               |                |               | 0                         | H      |
| 12S rRNA | 69             | 1014         | 946            |               |                |               | 0                         | H      |
| tRNA-Val | 1015           | 1086         | 72             |               |                |               | 0                         | H      |
| 16S rRNA | 1087           | 2784         | 1698           |               |                |               | 0                         | H      |
| tRNA-Leu | 2785           | 2858         | 74             |               |                |               | 0                         | H      |
| ND1      | 2859           | 3833         | 975            | 324           | ATG            | TAA           | 0                         | H      |
| tRNA-Ile | 3838           | 3907         | 70             |               |                |               | 4                         | H      |
| tRNA-Gln | 3907           | 3977         | 71             |               |                |               | -1                        | L      |
| tRNA-Met | 3977           | 4045         | 69             |               |                |               | -1                        | H      |
| ND2      | 4046           | 5091         | 1046           | 348           | ATG            | TA            | 0                         | H      |
| tRNA-Trp | 5092           | 5162         | 71             |               |                |               | 0                         | H      |
| tRNA-Ala | 5164           | 5232         | 69             |               |                |               | 1                         | L      |
| tRNA-Asn | 5234           | 5306         | 73             |               |                |               | 1                         | L      |
| tRNA-Cys | 5346           | 5411         | 66             |               |                |               | 39                        | L      |
| tRNA-Tyr | 5412           | 5481         | 70             |               |                |               | 0                         | L      |
| COI      | 5483           | 7033         | 1551           | 516           | GTG            | TAA           | 1                         | H      |
| tRNA-Ser | 7034           | 7104         | 71             |               |                |               | 0                         | L      |
| tRNA-Asp | 7108           | 7180         | 73             |               |                |               | 3                         | H      |
| COII     | 7188           | 7878         | 691            | 230           | ATG            | T             | 7                         | H      |
| tRNA-Lys | 7879           | 7952         | 74             |               |                |               | 0                         | H      |
| ATPase 8 | 7954           | 8121         | 168            | 55            | ATG            | TAA           | 1                         | H      |
| ATPase 6 | 8112           | 8794         | 683            | 227           | ATG            | TA            | -10                       | H      |
| COIII    | 8795           | 9579         | 785            | 261           | ATG            | TA            | 0                         | H      |
| tRNA-Gly | 9580           | 9651         | 72             |               |                |               | 0                         | H      |
| ND3      | 9652           | 10000        | 349            | 116           | ATG            | T             | 0                         | H      |
| tRNA-Arg | 10001          | 10069        | 69             |               |                |               | 0                         | H      |
| ND4L     | 10070          | 10366        | 297            | 98            | ATG            | TAA           | 0                         | H      |
| ND4      | 10360          | 11740        | 1381           | 460           | ATG            | T             | -7                        | H      |
| tRNA-His | 11741          | 11809        | 69             |               |                |               | 0                         | H      |
| tRNA-Ser | 11810          | 11877        | 68             |               |                |               | 0                         | H      |
| tRNA-Leu | 11883          | 11955        | 73             |               |                |               | 5                         | H      |
| ND5      | 11956          | 13794        | 1839           | 612           | ATG            | TAA           | 0                         | H      |
| ND6      | 13791          | 14312        | 522            | 173           | ATG            | TAG           | -4                        | L      |
| tRNA-Glu | 14313          | 14381        | 69             |               |                |               | 0                         | L      |
| Cyt b    | 14387          | 15527        | 1141           | 380           | ATG            | T             | 5                         | H      |
| tRNA-Thr | 15528          | 15599        | 72             |               |                |               | 0                         | H      |
| tRNA-Pro | 15599          | 15668        | 70             |               |                |               | -1                        | L      |
| D-loop   | 15669          | 16526        | 858            |               |                |               | 0                         | H      |

Table S3. Summary of gene/element feature of *S. rieffeli*.

| Gene     | Position-start | Position-end | Length<br>(bp) | Amino<br>acid | Start<br>codon | Stop<br>codon | Intergenic<br>region (bp) | Strand |
|----------|----------------|--------------|----------------|---------------|----------------|---------------|---------------------------|--------|
| tRNA-Phe | 1              | 68           | 68             |               |                |               | 0                         | H      |
| 12S rRNA | 69             | 1014         | 946            |               |                |               | 0                         | H      |
| tRNA-Val | 1015           | 1086         | 72             |               |                |               | 0                         | H      |
| 16S rRNA | 1087           | 2785         | 1699           |               |                |               | 0                         | H      |
| tRNA-Leu | 2786           | 2859         | 74             |               |                |               | 0                         | H      |
| ND1      | 2860           | 3834         | 975            | 324           | ATG            | TAG           | 0                         | H      |
| tRNA-Ile | 3839           | 3908         | 70             |               |                |               | 4                         | H      |
| tRNA-Gln | 3908           | 3978         | 71             |               |                |               | -1                        | L      |
| tRNA-Met | 3978           | 4046         | 69             |               |                |               | -1                        | H      |
| ND2      | 4047           | 5092         | 1046           | 348           | ATG            | TA            | 0                         | H      |
| tRNA-Trp | 5093           | 5163         | 71             |               |                |               | 0                         | H      |
| tRNA-Ala | 5165           | 5233         | 69             |               |                |               | 1                         | L      |
| tRNA-Asn | 5235           | 5307         | 73             |               |                |               | 1                         | L      |
| tRNA-Cys | 5347           | 5412         | 66             |               |                |               | 39                        | L      |
| tRNA-Tyr | 5413           | 5482         | 70             |               |                |               | 0                         | L      |
| COI      | 5484           | 7034         | 1551           | 516           | GTG            | TAA           | 1                         | H      |
| tRNA-Ser | 7035           | 7105         | 71             |               |                |               | 0                         | L      |
| tRNA-Asp | 7109           | 7181         | 73             |               |                |               | 3                         | H      |
| COII     | 7189           | 7879         | 691            | 230           | ATG            | T             | 7                         | H      |
| tRNA-Lys | 7880           | 7953         | 74             |               |                |               | 0                         | H      |
| ATPase 8 | 7955           | 8122         | 168            | 55            | ATG            | TAA           | 1                         | H      |
| ATPase 6 | 8113           | 8795         | 683            | 227           | ATG            | TA            | 0                         | H      |
| COIII    | 8796           | 9580         | 785            | 261           | ATG            | TA            | 0                         | H      |
| tRNA-Gly | 9581           | 9652         | 72             |               |                |               | 0                         | H      |
| ND3      | 9653           | 10001        | 349            | 116           | ATG            | T             | 0                         | H      |
| tRNA-Arg | 10002          | 10070        | 69             |               |                |               | 0                         | H      |
| ND4L     | 10071          | 10367        | 297            | 98            | ATG            | TAA           | 0                         | H      |
| ND4      | 10361          | 11741        | 1381           | 460           | ATG            | T             | -5                        | H      |
| tRNA-His | 11742          | 11810        | 69             |               |                |               | 0                         | H      |
| tRNA-Ser | 11811          | 11878        | 68             |               |                |               | 0                         | H      |
| tRNA-Leu | 11884          | 11956        | 73             |               |                |               | 5                         | H      |
| ND5      | 11957          | 13759        | 1803           | 600           | ATG            | TAA           | 0                         | H      |
| ND6      | 13792          | 14313        | 522            | 173           | ATG            | TAG           | 32                        | L      |
| tRNA-Glu | 14314          | 14382        | 69             |               |                |               | 0                         | L      |
| Cyt b    | 14388          | 15528        | 1141           | 380           | ATG            | T             | 5                         | H      |
| tRNA-Thr | 15529          | 15600        | 72             |               |                |               | 0                         | H      |
| tRNA-Pro | 15600          | 15669        | 70             |               |                |               | -1                        | L      |
| D-loop   | 15670          | 16527        | 858            |               |                |               | 0                         | H      |

Table S4. Summary of gene/element feature of *S. amiscus*.

| Gene     | Position-start | Position-end | Length<br>(bp) | Amino<br>acid | Start<br>codon | Stop<br>codon | Intergenic<br>region (bp) | Strand |
|----------|----------------|--------------|----------------|---------------|----------------|---------------|---------------------------|--------|
| tRNA-Phe | 1              | 68           | 68             |               |                |               | 0                         | H      |
| 12S rRNA | 69             | 1014         | 946            |               |                |               | 0                         | H      |
| tRNA-Val | 1015           | 1086         | 72             |               |                |               | 0                         | H      |
| 16S rRNA | 1087           | 2784         | 1698           |               |                |               | 0                         | H      |
| tRNA-Leu | 2785           | 2858         | 74             |               |                |               | 0                         | H      |
| ND1      | 2859           | 3833         | 975            | 324           | ATG            | TAG           | 0                         | H      |
| tRNA-Ile | 3838           | 3907         | 70             |               |                |               | 4                         | H      |
| tRNA-Gln | 3907           | 3977         | 71             |               |                |               | -1                        | L      |
| tRNA-Met | 3977           | 4045         | 69             |               |                |               | -1                        | H      |
| ND2      | 4046           | 5091         | 1046           | 348           | ATG            | TA            | 0                         | H      |
| tRNA-Trp | 5092           | 5162         | 71             |               |                |               | 0                         | H      |
| tRNA-Ala | 5164           | 5232         | 69             |               |                |               | 1                         | L      |
| tRNA-Asn | 5234           | 5306         | 73             |               |                |               | 1                         | L      |
| tRNA-Cys | 5346           | 5412         | 67             |               |                |               | 39                        | L      |
| tRNA-Tyr | 5413           | 5482         | 70             |               |                |               | 0                         | L      |
| COI      | 5484           | 7034         | 1551           | 516           | GTG            | TAA           | 1                         | H      |
| tRNA-Ser | 7035           | 7105         | 71             |               |                |               | 0                         | L      |
| tRNA-Asp | 7109           | 7181         | 73             |               |                |               | 3                         | H      |
| COII     | 7189           | 7879         | 691            | 230           | ATG            | T             | 7                         | H      |
| tRNA-Lys | 7880           | 7953         | 74             |               |                |               | 0                         | H      |
| ATPase 8 | 7955           | 8122         | 168            | 55            | ATG            | TAA           | 1                         | H      |
| ATPase 6 | 8113           | 8795         | 683            | 227           | GTG            | TA            | -10                       | H      |
| COIII    | 8796           | 9580         | 785            | 261           | ATG            | TA            | 0                         | H      |
| tRNA-Gly | 9581           | 9652         | 72             |               |                |               | 0                         | H      |
| ND3      | 9653           | 10001        | 349            | 116           | ATG            | T             | 0                         | H      |
| tRNA-Arg | 10001          | 10070        | 70             |               |                |               | -1                        | H      |
| ND4L     | 10071          | 10367        | 297            | 98            | ATG            | TAA           | 0                         | H      |
| ND4      | 10361          | 11741        | 1381           | 460           | ATG            | T             | -7                        | H      |
| tRNA-His | 11742          | 11810        | 69             |               |                |               | 0                         | H      |
| tRNA-Ser | 11811          | 11878        | 68             |               |                |               | 0                         | H      |
| tRNA-Leu | 11885          | 11957        | 73             |               |                |               | 6                         | H      |
| ND5      | 11958          | 13796        | 1839           | 612           | ATG            | TAG           | 0                         | H      |
| ND6      | 13793          | 14314        | 522            | 173           | ATG            | TAG           | -4                        | L      |
| tRNA-Glu | 14315          | 14383        | 69             |               |                |               | 0                         | L      |
| Cyt b    | 14389          | 15529        | 1141           | 380           | ATG            | T             | 5                         | H      |
| tRNA-Thr | 15530          | 15601        | 72             |               |                |               | 0                         | H      |
| tRNA-Pro | 15601          | 15670        | 70             |               |                |               | -1                        | L      |
| D-loop   | 15671          | 16526        | 856            |               |                |               | 0                         | H      |

Table S5. The base composition of 4 Peristediidae fishes.

|            | <i>Pe.P. liorhynchus</i> |      |      |      | <i>Sa. welchi</i> |      |      |      | <i>Sa. rieffeli</i> |      |      |      | <i>Sc. amiscus</i> |      |      |      |
|------------|--------------------------|------|------|------|-------------------|------|------|------|---------------------|------|------|------|--------------------|------|------|------|
|            | T                        | C    | A    | G    | T                 | C    | A    | G    | T                   | C    | A    | G    | T                  | C    | A    | G    |
| ND1        | 29.4                     | 32   | 22.7 | 15.8 | 30.8              | 30.6 | 22.5 | 16.2 | 30.8                | 31   | 22.4 | 15.8 | 31.2               | 30.5 | 22.3 | 16.0 |
| ND2        | 25.4                     | 36.7 | 24.2 | 13.7 | 27.5              | 33.2 | 26.3 | 12.9 | 28.0                | 33.1 | 26.3 | 12.5 | 28.0               | 32.6 | 25.7 | 13.8 |
| COI        | 28.4                     | 30.5 | 22.9 | 18.3 | 29.1              | 28.5 | 24.7 | 17.7 | 30.5                | 27.3 | 24.2 | 18.0 | 31.1               | 27.3 | 23.7 | 18.0 |
| COII       | 27.8                     | 28.1 | 27   | 17.1 | 27.0              | 28.7 | 28.4 | 15.9 | 27.4                | 28.0 | 28.3 | 16.4 | 28.8               | 27.1 | 27.8 | 16.2 |
| ATPase 8   | 21.2                     | 38.2 | 27.9 | 12.7 | 21.2              | 37.6 | 29.7 | 11.5 | 21.2                | 36.4 | 30.9 | 11.5 | 22.4               | 35.8 | 30.9 | 10.9 |
| ATPase 6   | 27.9                     | 34.1 | 23.9 | 14.1 | 28.8              | 32.9 | 24.8 | 13.5 | 28.6                | 32.9 | 25.3 | 13.2 | 29.7               | 31.6 | 25.0 | 13.8 |
| COIII      | 26.7                     | 31.7 | 24.9 | 16.7 | 26.9              | 30.8 | 24.8 | 17.5 | 28.4                | 29.8 | 24.3 | 17.6 | 28.1               | 30.1 | 24.5 | 17.2 |
| ND3        | 28.2                     | 35.3 | 18.7 | 17.8 | 32.2              | 31.9 | 19.8 | 16.1 | 32.8                | 31.3 | 18.7 | 17.2 | 30.7               | 33.6 | 20.7 | 14.9 |
| ND4L       | 29.6                     | 34.0 | 20.1 | 16.3 | 28.9              | 33.3 | 22.1 | 15.6 | 28.6                | 34.7 | 20.1 | 16.7 | 31.6               | 32.0 | 20.4 | 16.0 |
| ND4        | 27.9                     | 31.1 | 24.8 | 16.2 | 28.1              | 31.6 | 25.3 | 15.0 | 28.3                | 30.9 | 25.8 | 14.9 | 28.4               | 30.7 | 25.1 | 15.8 |
| ND5        | 27.2                     | 31.8 | 26.2 | 14.8 | 27.2              | 31.9 | 27.0 | 13.9 | 27.8                | 31.0 | 27.0 | 14.1 | 28.6               | 30.6 | 26.8 | 14.0 |
| ND6        | 36.3                     | 15.2 | 13.8 | 34.7 | 37.6              | 13.3 | 16.0 | 33.1 | 37.6                | 13.7 | 15.2 | 33.5 | 36.0               | 15.2 | 14.8 | 33.9 |
| Cyt b      | 28.6                     | 32.2 | 22.6 | 16.6 | 27.8              | 33.2 | 23.8 | 15.3 | 29.1                | 31.8 | 23.8 | 15.3 | 29.6               | 31.7 | 23.1 | 15.7 |
| PBGs       | 28.0                     | 31.6 | 23.1 | 17.3 | 28.7              | 30.6 | 24.2 | 16.5 | 29.2                | 30.0 | 24.6 | 16.2 | 29.6               | 29.9 | 23.9 | 16.6 |
| rRNA       | 21.1                     | 25.6 | 32.6 | 20.7 | 21.8              | 25.6 | 31.7 | 21.0 | 21.9                | 25.3 | 31.9 | 20.9 | 22.2               | 24.8 | 31.7 | 21.3 |
| tRNA       | 26.3                     | 22.0 | 27.7 | 24.0 | 26.5              | 21.8 | 27.9 | 23.8 | 26.7                | 21.4 | 27.6 | 24.2 | 26.8               | 21.4 | 28.0 | 23.8 |
| CR         | 30.1                     | 21.2 | 31.8 | 16.9 | 29.6              | 21.7 | 31.7 | 17.0 | 30.0                | 21.4 | 32.3 | 16.3 | 29.7               | 20.9 | 32.1 | 17.3 |
| Mitogenome | 26.0                     | 30.0 | 26.8 | 17.2 | 26.5              | 29.4 | 27.4 | 16.7 | 26.9                | 28.9 | 27.4 | 16.8 | 27.3               | 28.6 | 27.1 | 17.0 |

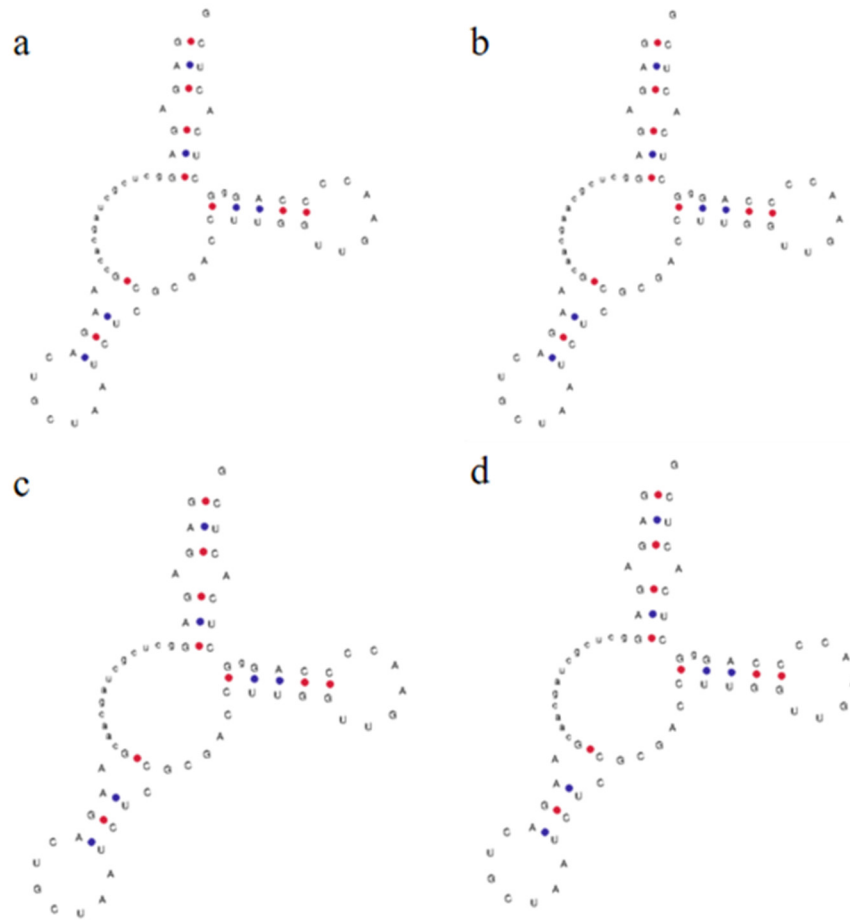

Figure S1. Inferred secondary structures of tRNA-Ser (GCT) gene in 4 Peristediidae mitogenomes. Note: (a) *P. liorhynchus*, (b) *S. amiscus*, (c) *S. rieffeli*, (d) *S. welchi*.
